# Supplementary material
Source: PubMed Central journal article supplement (PMC4668114)

**ESM Figure 1.** Glucose, insulin and NEFA response to an oral glucose tolerance test in obese white and black South African women. Values are mean  $\pm$  standard deviation.

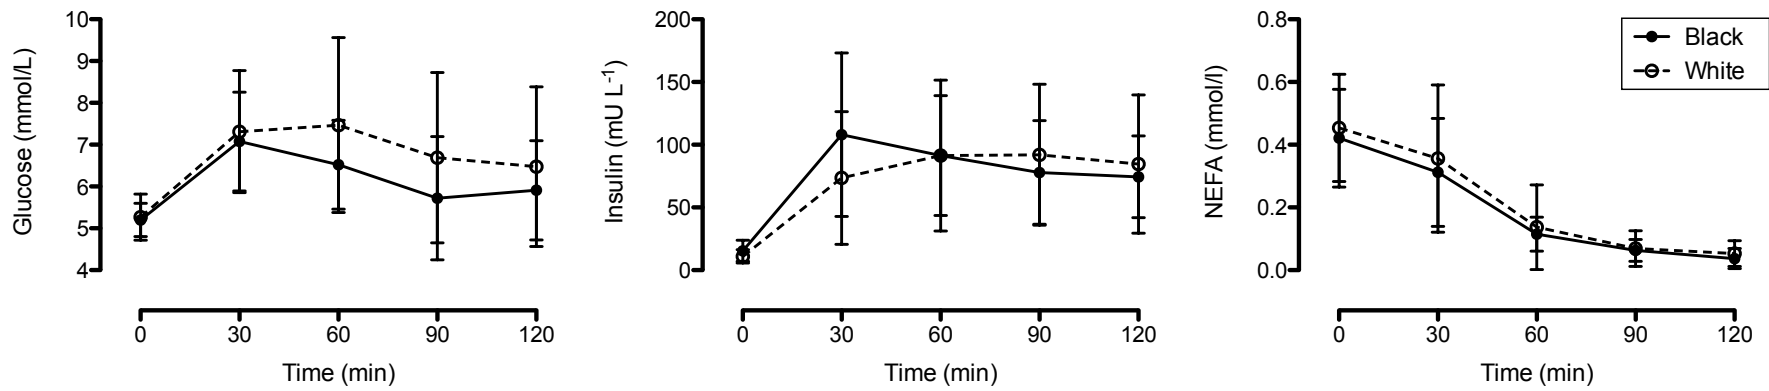

Supplement: NIHMS716741-supplement-2.pdf [file NIHMS716741-supplement-2.pdf]
