# Supplementary material
Source: PubMed Central journal article supplement (PMC4668114)
Supplement: NIHMS716741-supplement-3.pdf [file NIHMS716741-supplement-3.pdf]

**ESM Table 1.** Assay details for real-time PCR and differences in gene expression between obese white and black women.

| Gene                                                                              | Forward Primer           | Reverse Primer           | Obese white | Obese black | p value | p adjust<br>FMI |
|-----------------------------------------------------------------------------------|--------------------------|--------------------------|-------------|-------------|---------|-----------------|
| Insulin receptor substrate 1 (IRS1)                                               | agagcatgcacaaacgcttctcg  | gtcagcccgttgtgatgtgaa    | 1.19 ± 0.08 | 1.20 ± 0.05 | 0.757   | 0.423           |
| Glucose transporter 4 (GLUT4)                                                     | tcttcacctggctctcggtgtgt  | cacgaagccaaagatggccacaat | 1.15 ± 0.04 | 1.15 ± 0.05 | 0.635   | 0.749           |
| Vesicle associated membrane<br>protein (VAMP)                                     | tgccactaacaatctcagtccgt  | aggccagtcacattctgttctcca | 1.10 ± 0.07 | 1.11 ± 0.04 | 0.719   | 0.378           |
| Syntaxin 4 (STX4)                                                                 | aatgcagtccgaataccgggagaa | agcatctgctccaactcctcatca | 1.08 ± 0.07 | 1.09 ± 0.04 | 0.669   | 0.386           |
| Stearoyl-CoA desaturase 1 (SCD1)                                                  | aaacctggcttgctgatgatgtgc | tcgcaagaaagtggaacgaacac  | 1.18 ± 0.07 | 1.17 ± 0.05 | 0.765   | 0.897           |
| Peroxisome proliferator-activated<br>receptor gamma coactivator 1-alpha<br>(PGC1) | agacagcttctgggtggactcaa  | tcagcgcataaatgagggaatc   | 1.06 ± 0.05 | 1.07 ± 0.04 | 0.525   | 0.366           |
| β2 microglobulin (B2M)                                                            | agcgtactccaaagattcaggtt  | atgatgctgcttacatgtctcgat |             |             |         |                 |

Values are mean ± standard deviation.
